# Supplementary material for: Ribosome reactivates transcription by physically pushing RNA polymerase out of transcription arrest
Source: PubMed Central journal article supplement (PMC7165469; doi:10.1073/pnas.1919985117), 2020-04-01
Supplement: pnas.1919985117.sapp.pdf [file pnas.1919985117.sapp.pdf]

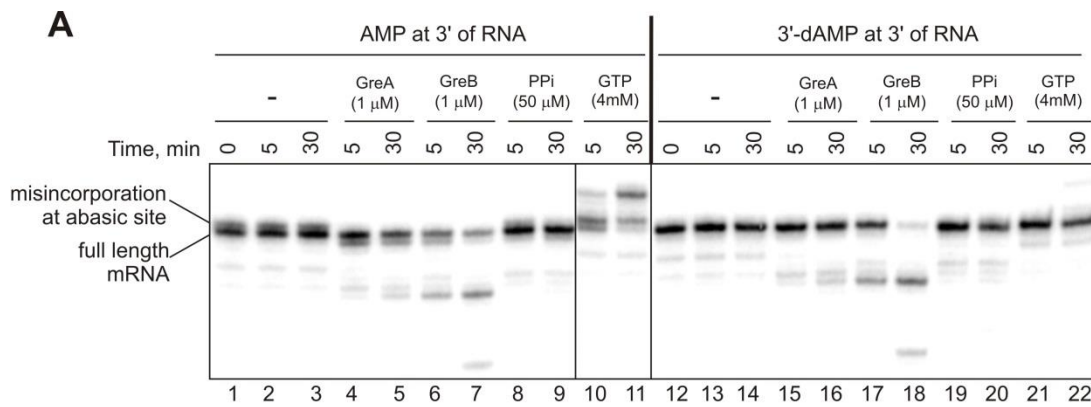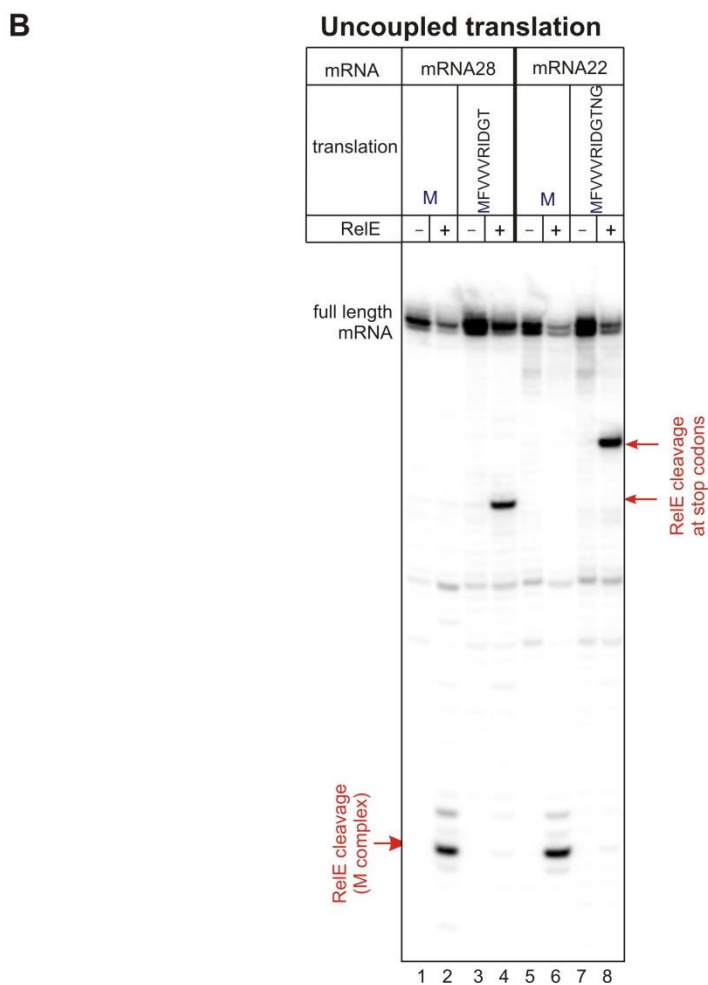

**Fig. S3. Characterization of experimental system for distance measurements. A.** Analysis of translocation state of the EC, by intrinsic, GreA and GreB cleavages (which take place only in backtracked states), pyrophosphorolysis (which takes place only in pre-translocated state), and GMP incorporation. Note that the fast cleavage by Gre factors happens only for RNA that is one nucleotide longer than full-sized mRNA (that incorporated NMP against abasic site). **B.** In uncoupled translation (without EC), RelE cleavage is not compromised irrespective of the proximity of ribosome to the mRNA's 3' end.

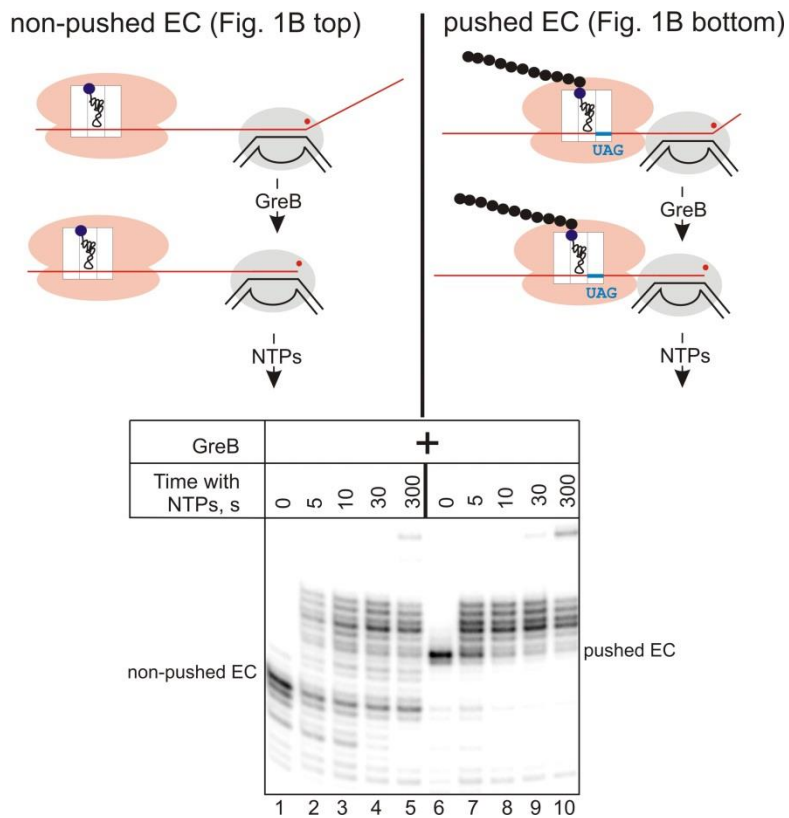

**Fig. S4. Physical contact between ribosome and EC does not affect transcription elongation.** C. Elongation in ECs contacting (right) or not-contacting (left) the ribosome on mRNA (see Fig. 1B for detailed scheme). Transcription was performed in the presence of GreB to reactivate the backtracked complexes.
